# Supplementary material for: A photocontrolled and self-powered bipedal DNA walking machine for intracellular microRNA imaging
Source: Royal Society of Chemistry journal article supplement (doi:10.1039/d0cc00017e), 2020-01-01
Supplement: d0cc00017e1.pdf [file d0cc00017e1.pdf]

## Supporting Information

### Photocontrolled and self-powered bipedal DNA walking machine for intracellular microRNA imaging

Chang Liu, Yanlei Hu, Qingshan Pan, Jintao Yi, Juan Zhang, Manman He, Mengyun He, Cunpeng Nie, Tingting Chen\* and Xia Chu\*

State Key Laboratory of Chemo/Bio-Sensing and Chemometrics, College of Chemistry and Chemical Engineering, Hunan University, Changsha 410082, P. R. China

E-mail: chenting1104@hnu.edu.cn; [xiachu@hnu.edu.cn](mailto:xiachu@hnu.edu.cn)

## **Reagents and materials**

HAuCl<sub>4</sub>·4H<sub>2</sub>O, Tween 20, and tris(2-carboxyethyl) phosphine hydrochloride (TCEP·HCl) were obtained from Sigma-Aldrich (St. Louis, MO, USA). MnCl<sub>2</sub>, MgCl<sub>2</sub>, NaCl, dithiothreitol (DTT), tris (hydroxymethyl) aminomethane (Tris), and trisodium citrate were purchased from Sinopharm Chemical Reagent Co., Ltd (Shanghai, China). MicrONhsa-miR-21-5p mimic and micrOFFhsa-miR-21-5p inhibitors were obtained from RiboBio Company (Guangzhou, China). CCK-8 reagent was supplied by Dojindo Laboratories (Kumamoto, Japan). All oligonucleotides listed in Table S1 were synthesized and HPLC-purified by Sangon Biotechnology Co., Ltd. (Shanghai, China). All solutions were prepared using ultrapure water, which was obtained through a Millipore Milli-Q water purification system (Billerica, MA, USA), with an electric resistance of >18.3 MΩ.

## **Apparatus.**

UV-vis absorption spectra were studied on an UV-2550 spectrometer (Shimadzu, Japan). Transmission electron microscopy (TEM) images were taken on a JEM-2100 transmission electron microscope (JEOL, Japan). Fluorescence spectra and the real-time fluorescence data were recorded with a Hitachi F-7000 fluorescence spectrometer (Hitachi, Japan). Zeta potential and dynamic light scattering (DLS) were measured with the Malvern Zetasizer Nano ZS90 (Malvern, USA). Confocal images of cells were acquired with a Nikon confocal laser scanning fluorescence microscope (Nikon, Japan).

## **Synthesis of citrate capped AuNPs.**

The preparation of the 13 nm AuNPs were reported previously.<sup>1</sup> In brief, 100 mL HAuCl<sub>4</sub> aqueous (0.01%) was heated to boiling under reflux. Then, 3.5 mL of the trisodium citrate solution (1%) was quickly added under stirring and kept it boiling for another 10 min. The solution changed from pale yellow to deep red. After the solution reached to room-temperature, the colloid was filtrated through a millipore membrane filter (0.45 μm). The prepared AuNPs were kept at 4 °C for future use. The concentration of these AuNPs was ~10 nM by measuring their UV-vis absorption at 520 nm ( $\epsilon = 2.7 \times 10^8 \text{ M}^{-1} \text{ cm}^{-1}$ ).

## **Fabrication of bipedal DNA walking machine.**

The bipedal DNA walking machine was prepared as described below. Firstly, the thiol-modified DNA strands were reduced by TCEP·HCl at a molar ratio of 1: 100 for 1 h to reduce the disulfide bond before use. Then, the blocker-DNAzyme strands were prepared by incubation of the 12.5  $\mu\text{L}$  of 10  $\mu\text{M}$  DNAzyme 1, 15.0  $\mu\text{L}$  of 10  $\mu\text{M}$  DNAzyme 2, and 55  $\mu\text{L}$  of 10  $\mu\text{M}$  blocker in the 25 mM Tris-HCl (pH 7.4) with 137 mM NaCl at 37°C for 2 h. The excess blocker strands were to confirm the DNAzymes were silenced by the blocker. Subsequently, the above mixture and 250  $\mu\text{L}$  of 10  $\mu\text{M}$  fluorescence substrate were added to the 500  $\mu\text{L}$  AuNPs (10 nM) with the molar ratio of 1:25:500 for the AuNPs, the blocker-DNAzyme strands, and the fluorescence substrate. After shaken at room temperature for 16 h, 31  $\mu\text{L}$  of 1% Tween 20 was added to the above solution to reduce the adsorption and aggregation of AuNPs. Then, the phosphate buffer (0.1 mM PB, pH = 7.4) was added to the above solution to reach 0.01 M, and NaCl solution (2.0 M) was slowly added to the solution to reach 0.3 M NaCl over an 8 h period four times. Finally, the mixture was centrifuged (13000 rpm, 30 min) and washed with Tris-HCl buffer three times. The solution was stored in the 25 mM Tris-HCl (pH 7.4) with 137 mM NaCl.

### **Measurement of substrates loading on AuNP.**

The substrate strands on surface of AuNP were determined by the previous method.<sup>2</sup> 10  $\mu\text{L}$  of 100 mM DTT was added to the 10  $\mu\text{L}$  of 10 nM DNA-functionalized AuNPs solution, and the above solution was diluted to 100  $\mu\text{L}$  by 1 $\times$  PBS buffer. After the solution was shaken overnight, released FAM-labeled substrate strands were separated via centrifugation (13000 rpm, 10 min). The fluorescence of the solution was measured by F7000. By comparing to the standard curve of FAM-labeled substrate, we speculated  $\sim$ 78 substrate strands loading on AuNPs. On the basis of a molar ratio of 1:20 for the DNAzyme strand and the FAM-labeled substrate strand used together in the conjugation reaction, average  $\sim$  4 DNAzyme strands were modified on each AuNPs.

### **PAGE electrophoresis.**

All samples were prepared in advance for PAGE electrophoresis assay. For example, an aliquot of solution (7  $\mu\text{L}$ ) containing DNAzyme 3 (2.86  $\mu\text{M}$ ), blocker (3.14  $\mu\text{M}$ ) were incubated at 37°C for 2 h. Then, 1  $\mu\text{L}$  substrate (20  $\mu\text{M}$ ), 1  $\mu\text{L}$  miRNA-21 target (22  $\mu\text{M}$ ), and 1  $\mu\text{L}$   $\text{Mn}^{2+}$  (7500  $\mu\text{M}$ ) were added to the above solution and incubated at 37°C for 2 h. Finally, the products were analyzed by 20% denaturing polyacrylamide gel. Electrophoresis was carried out at 120 V

for 2.5 h.

### **Evaluation of miRNA-initiated bipedal DNA walking machine operation *in vitro*.**

The miRNA-21 target with the same sequence of miRNA-21 was applied to initiate the operation of the walking machine. The bipedal DNA walking machine (2.5 nM) were incubated with the different concentrations of miRNA-21 in 25 mM Tris-HCl buffer containing 137 mM NaCl at 37°C for 1 h. Then, upon irradiation with 302 nm light for 5 min, 750  $\mu$ M MnCl<sub>2</sub> were added to the above operating solutions. After incubation at 37°C for 2 h, the fluorescence was monitored with excitation at 488 nm and emission at 525 nm.

### **Cell culture.**

HeLa, MCF-7 and L02 cells were grown in RPMI-1640 medium containing 10% fetal bovine serum, 100 U/mL streptomycin, and 100 U/mL penicillin. All cells were maintained at a humidified atmosphere of 5% CO<sub>2</sub> and 95% air at 37°C.

### **Cell viability assay.**

HeLa cells ( $2 \times 10^3$ ) were dispersed into 96-well plates in 200  $\mu$ L culture medium. After incubation at 37°C for 24 h, the cells were treated with different concentrations of AuNPs (2.5 nM, 5.0 nM and 7.5 nM) in 100  $\mu$ L RPMI-1640 medium at 37°C for different times (6 h, 12 h, 18 h and 24 h). Then, the cells were washed three times with PBS, and incubated with 10  $\mu$ L of CCK-8 reagent in 100  $\mu$ L culture medium for 2 h. Following that, the cell viability was evaluated by measuring the absorbance at 450 nm by using an ELx800™ microplate reader.

### **Evaluation of intracellular operation of the bipedal walking machine.**

The cells were seeded on a 35 mm Petri dish with a 10 mm well in 2 mL of culture medium at 37°C for 24 h. Then, the cells were washed with PBS and incubated with 1 mL of culture medium containing 2.5 nM DNA-functionalized AuNPs at 37°C for 6 h. Then, the cells were treated with light irradiation for 5 min, washed with PBS, and incubated with 1 mL of culture medium containing 250  $\mu$ M Mn<sup>2+</sup> at 37°C for 2 h. The cells were washed three times with cold PBS before imaging.

To investigate the miRNA-21 expression fluctuations in living cells, the HeLa cells were firstly treated with 0.2 mM MicrONhsa-miR-21-5p mimic or 0.5 mM MicrOFFhsa-miR-21-5p inhibitor and 6  $\mu$ L of transfection reagent in 1 mL culture medium at 37°C for 24 h. Then the cells

were washed three times and incubated with 1 mL of culture medium containing 2.5 nM DNA-functionalized AuNPs at 37°C. After incubation for 6 h, the cells were treated with light irradiation for 5 min, washed with PBS, and incubated with 1 mL of culture medium containing 250  $\mu\text{M}$   $\text{Mn}^{2+}$  at 37°C for 2 h. The cells were washed three times with cold PBS before imaging. All fluorescence images were acquired using an oil dipping objective (100 $\times$ , 1.25 NA) on a Nikon confocal laser scanning fluorescence microscope.

#### **Flow cytometric assay.**

Cells ( $10^5$  cells) were incubated with 1 mL of culture medium containing 2.5 nM DNA-functionalized AuNPs at 37°C for 6 h. Then the cells were treated with light irradiation for 5 min, washed with PBS, and incubated with 1 mL of culture medium containing 250  $\mu\text{M}$   $\text{Mn}^{2+}$  at 37°C for 2 h. Subsequently, the cells were washed with PBS, and detached from culture dishes using 0.25% trypsin for 2 min. Cells were centrifuged (3000 rpm, 4 min) and washed with Tris-HCl buffer three times. The cells were then resuspended in 1 mL PBS followed by flow cytometry assay in FITC channel on a CytoFLEX flow cytometry system (Beckman Coulter, USA).

**Table S1.** Sequence information for oligonucleotides and miRNAs used in this work

| Name                        | Sequence (5'-3')                                                                                   |
|-----------------------------|----------------------------------------------------------------------------------------------------|
| blocker                     | AAATGTCACTCATGTTCAACATCAGTCTGATAAGCTA                                                              |
| nonspecific blocker         | AAATGTCACTCATGTTCAACATCAGTCTGATGCTATC                                                              |
| DNAzyme 1                   | ATCAGACTGATGTTGAACAGGCTAGCTACAACGAGAGTGACA<br>TTTTTTTTTTGGCTTGGCTTGGCTTTTTTTT(PC linker)TTTTTTT-SH |
| DNAzyme 2                   | ATCAGACTGATGTTGAACAGGCTAGCTACAACGAGAGTGACA<br>TTTTTTTTTTGCAAGCCAAGCC                               |
| DNAzyme 3 for PAGE analysis | ATCAGACTGATGTTGAACAGGCTAGCTACAACGAGAGTGACA<br>TTTTTTTTT                                            |
| fluorescence substrate      | FAM-TGTCACTCrAUGTTCAACATCAGTTTTTTTTTTTTTTTTT-SH                                                    |
| fluorescence substrate 1    | FAM-GTCACTCrAUGTTCAACATCAGTTTTTTTTTTTTTTTTT-SH                                                     |
| substrate for PAGE analysis | TTTTTGTCACTCrAUGTTCAACATCAGTTTTT                                                                   |
| miRNA-21 target             | TAGTTATCAGACTGATGTTGA                                                                              |
| miRNA-222                   | AGCUACAUCUGGCUACUGGGUCUC                                                                           |
| miRNA-141                   | UAACACUGUCUGGUAAAGAUGG                                                                             |
| single-base mismatch target | TAGTTTATCAGACTGATGTTGA                                                                             |
| two-base mismatch target    | TAGTTTATCAGACAGATGTTGA                                                                             |
| three-base mismatch target  | TAGTTTATCAGACAGATCTTGA                                                                             |

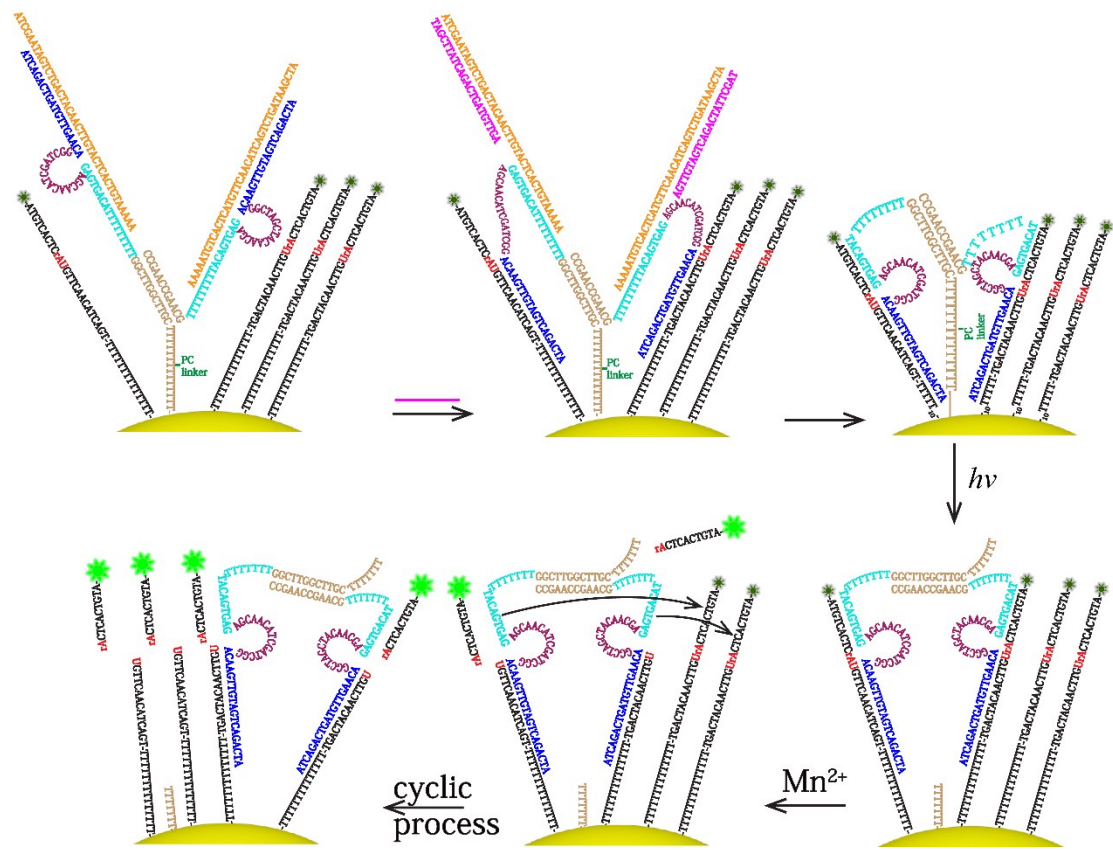

**Fig. S1** Schematic illustration of the operation of the miRNA-initiated self-powered bipedal DNA walking machine.

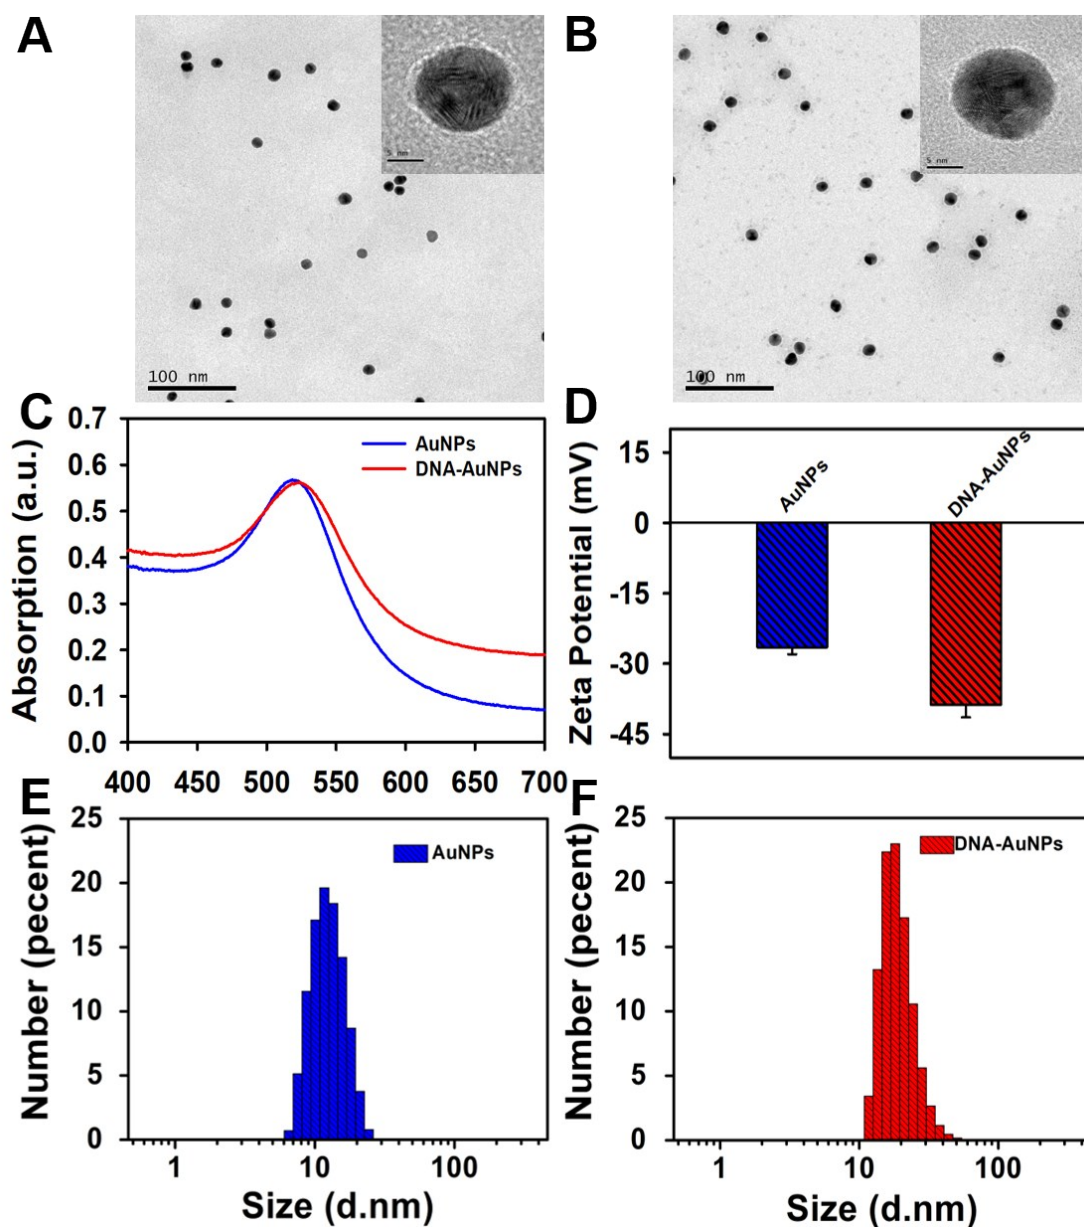

**Fig. S2** Characterization of the bare AuNPs and the DNA-modified with AuNPs. TEM images of (A) bare AuNPs and (B) the DNA-modified with AuNPs. (C) UV-vis absorption spectra of bare AuNPs and (blue line) the DNA-modified with AuNPs (red line). (D) Zeta-potential of bare AuNPs and the DNA-modified with AuNPs. The DLS of (E) bare AuNPs and (F) the DNA-modified with AuNPs.



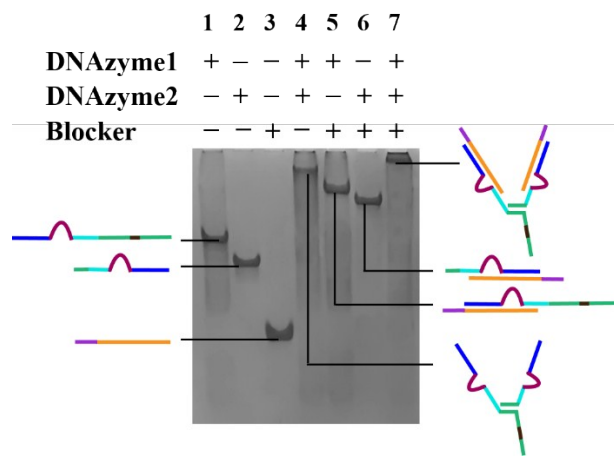

**Fig. S3** PAGE gel electrophoresis image.

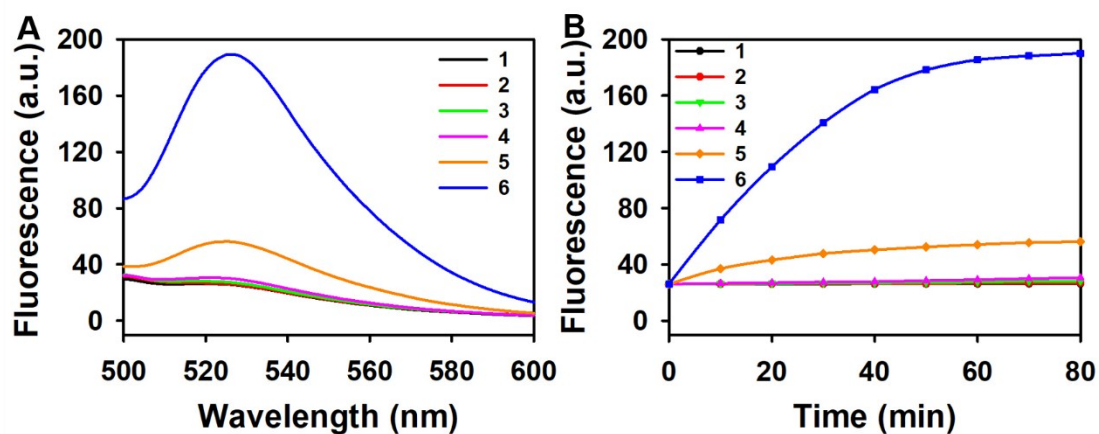

**Fig. S4** (A) Fluorescence spectra and (B) real-time fluorescence of (1) the bipedal DNA walking machine, (2) the walking machine upon the light irradiation, (3) the walking machine incubated with miRNA-21 upon the light irradiation, (4) the walking machine incubated with  $Mn^{2+}$  upon the light irradiation, (5) the walking machine incubated with miRNA-21 and  $Mn^{2+}$ , (6) the walking machine incubated with miRNA-21 and  $Mn^{2+}$  upon the light irradiation.

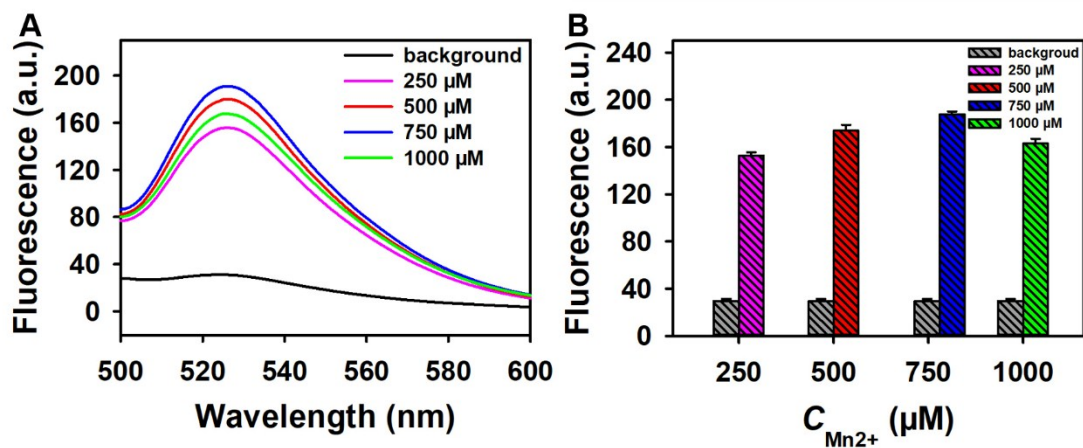

**Fig. S5** Effect of the cofactor ( $\text{Mn}^{2+}$ ) on the operation of the bipedal DNA walker. (A) Fluorescence spectral responses of 2.5 nM DNA-functionalized AuNPs to the different concentrations of the cofactor  $\text{Mn}^{2+}$  (250, 500, 750, and 1000  $\mu\text{M}$ ) upon the light irradiation. (B) Fluorescence intensities at 525 nm versus different concentrations of the cofactor  $\text{Mn}^{2+}$  (the excitation at 488 nm) upon the light irradiation.

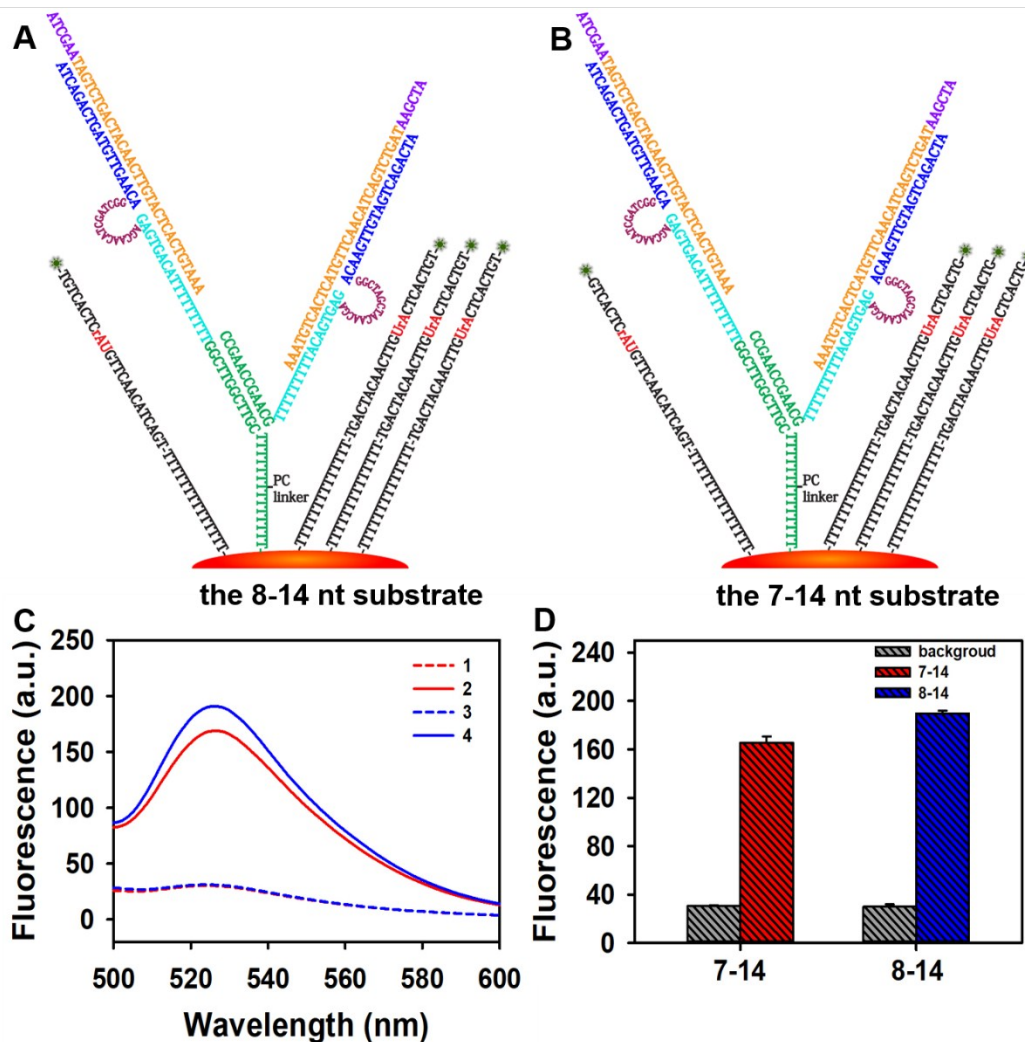

**Fig. S6** Construction of (A) the 8-14 nt substrate strands and (B) the 7-14 nt substrate strands-modified on the AuNPs. (C) Fluorescence spectra of the 7-14 fluorescently labelled substrate strands-modified AuNPs before (1) and after (2) addition of miRNA-21 target, and 8-14 fluorescently labelled substrate strands-modified AuNPs before (3) and after (4) addition of miRNA-21 target in the presence of  $Mn^{2+}$ , upon the light irradiation. (D) Fluorescence intensities versus varying length of the substrate.

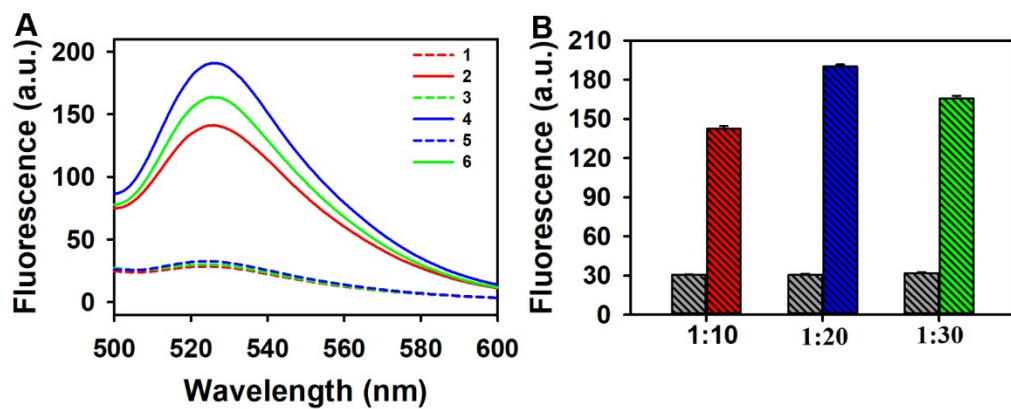

**Fig. S7** The bipedal DNA walking machine constructed with different ratio of the DNAzyme walking strands to substrate strands in response to the miRNA-21 in the presence of  $Mn^{2+}$  upon the light irradiation.

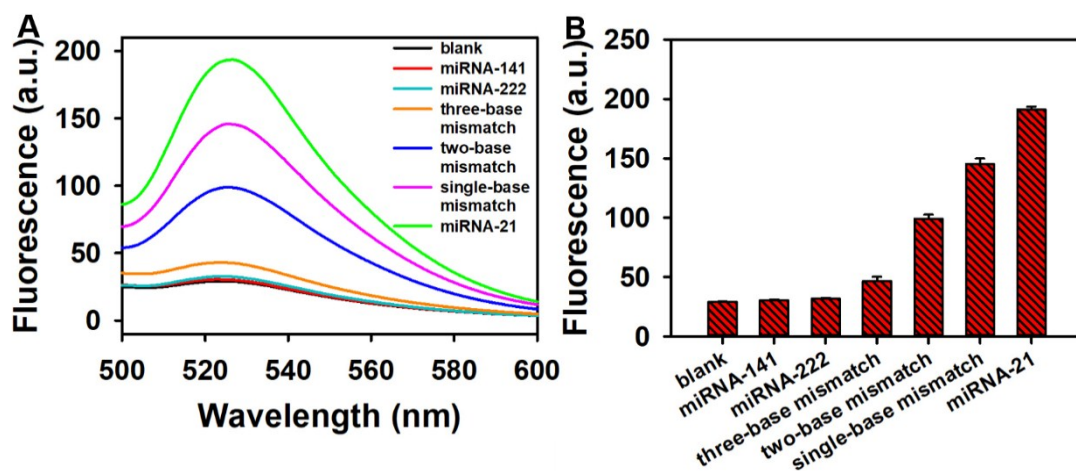

**Fig. S8** (A) Fluorescence spectra and (B) intensities of the bipedal DNA walking machine in response to the different targets in the presence of  $Mn^{2+}$  (750  $\mu M$ ) upon the light irradiation.

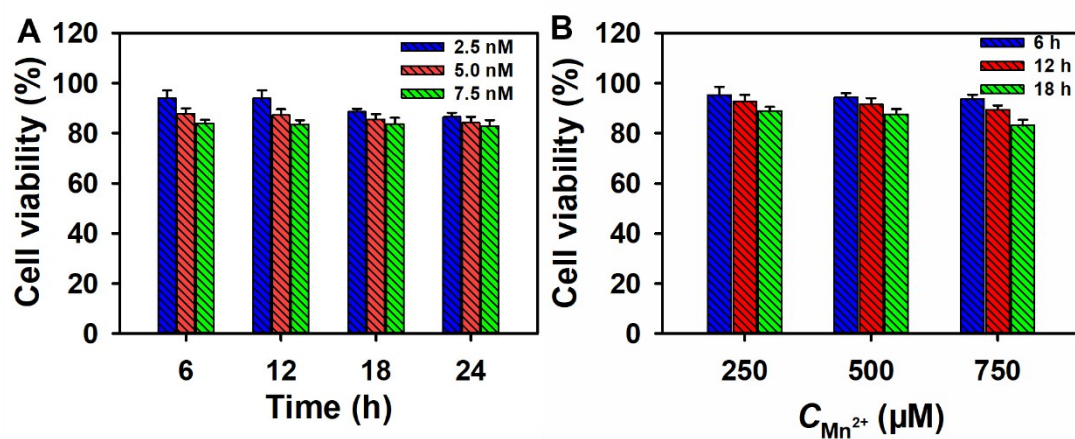

**Fig. S9** Cell viability determined by CCK-8 assay in HeLa cells. HeLa cells treated with (A) different concentrations of DNA-functionalized AuNPs (2.5, 5.0, and 7.5 nM) and 250 μM Mn<sup>2+</sup> for different times (6, 12, 18, and 24 h), (B) different concentrations of Mn<sup>2+</sup> for different times (6, 12 and 18 h).

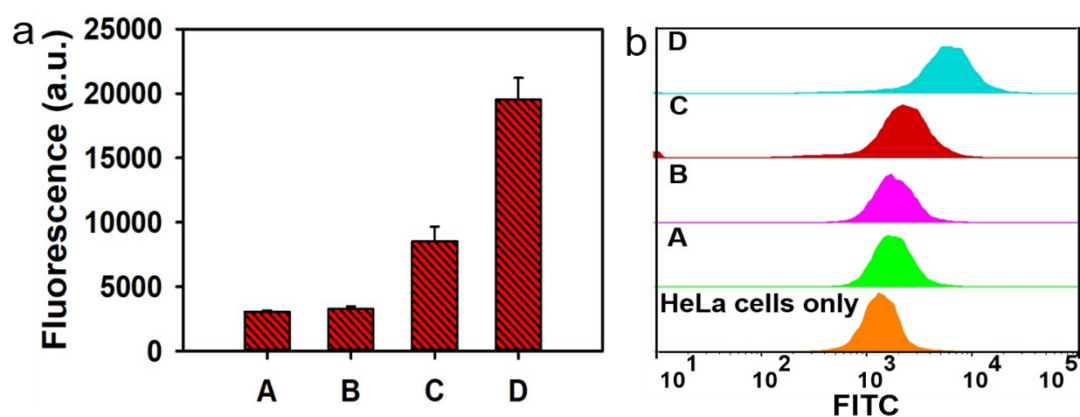

**Fig. S10** (a) Mean fluorescence values in HeLa imaging after incubation with (A) bipedal DNA walking machine only, (B) nonspecific walking machine and 250  $\mu\text{M}$   $\text{Mn}^{2+}$ , upon light irradiation, (C) bipedal walking machine and 250  $\mu\text{M}$   $\text{Mn}^{2+}$ , (D) bipedal walking machine and 250  $\mu\text{M}$   $\text{Mn}^{2+}$ , upon light irradiation. (b) Flow cytometry analysis of HeLa cells and HeLa cells treated with above different treatment.



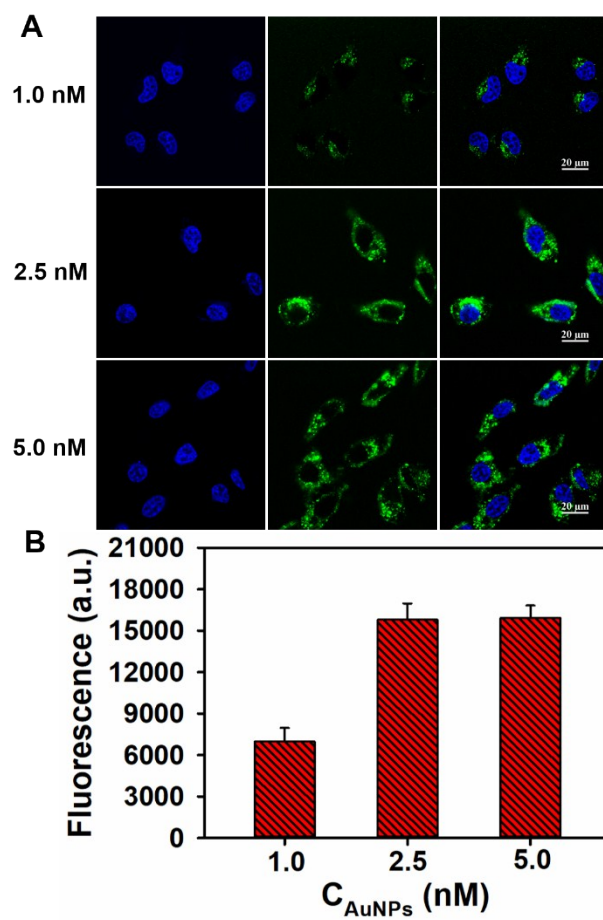

**Fig. S11** (A) The Fluorescence images and (B) mean fluorescence values of HeLa cells incubated with different concentrations of the bipedal DNA walking machine in the presence of  $\text{Mn}^{2+}$  ( $250 \mu\text{M}$ ) upon the light irradiation.

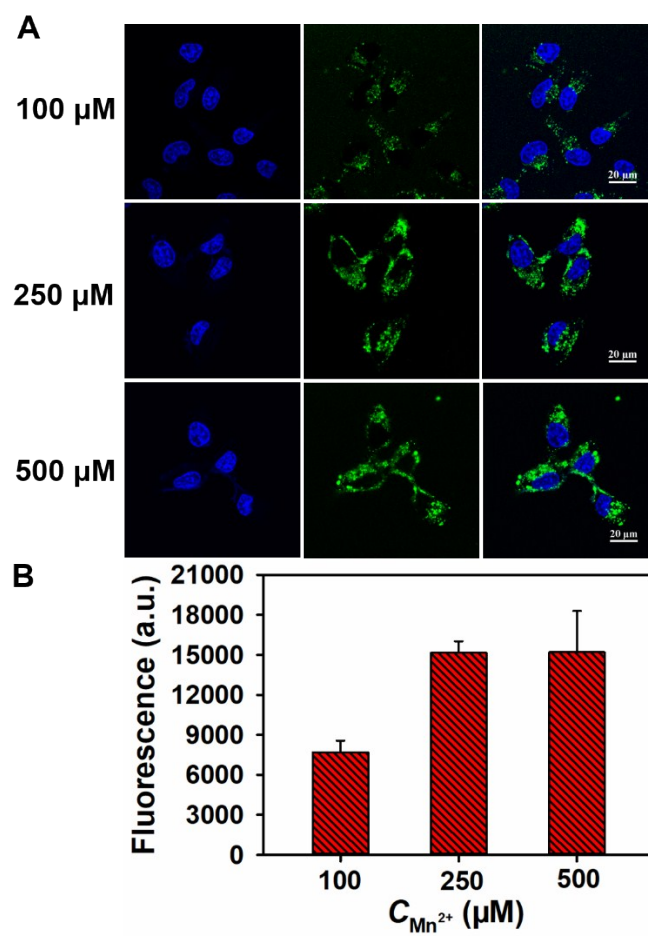

**Fig. S12** (A) Fluorescence images and (B) average fluorescence intensity of HeLa cells incubated with the bipedal DNA walking machine and different concentrations of  $\text{Mn}^{2+}$  upon the light irradiation.

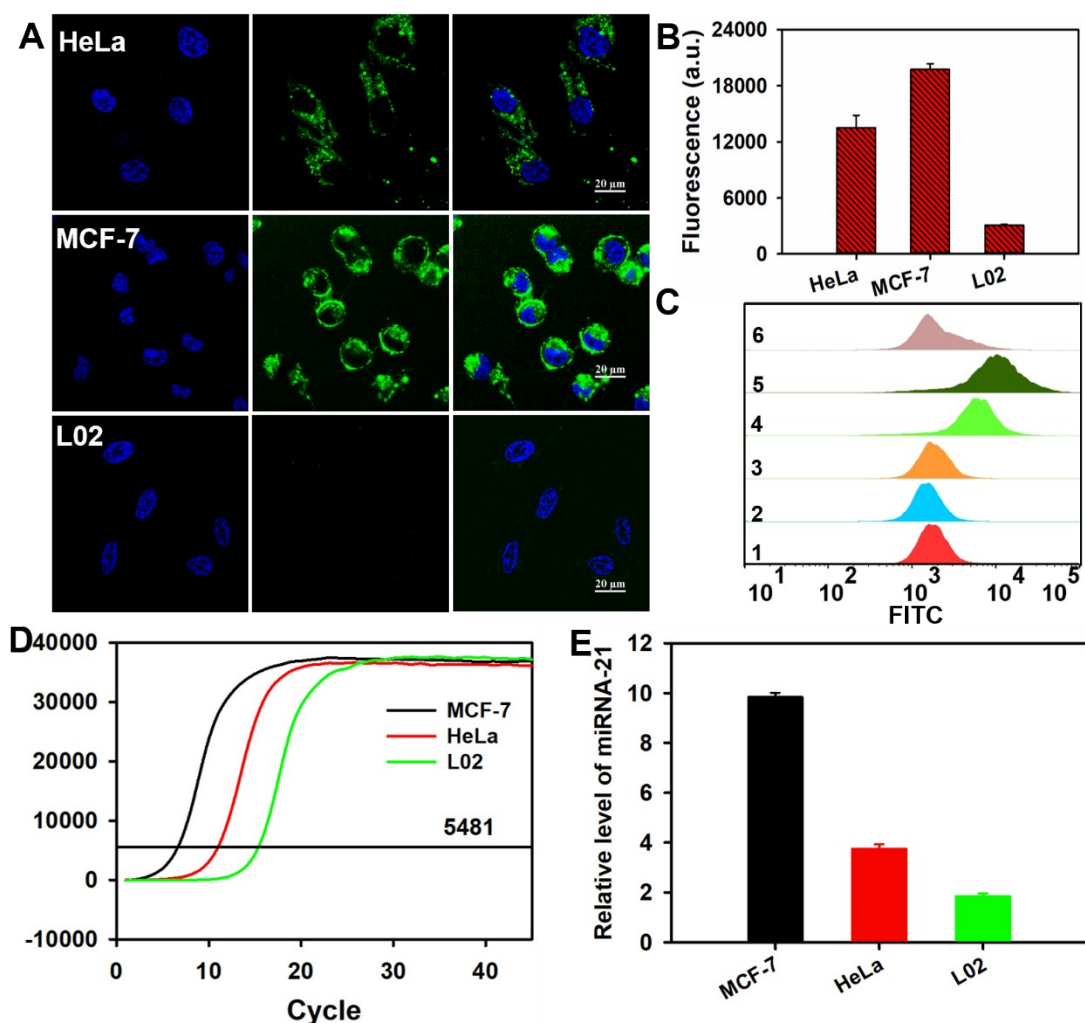

**Fig. S13** Operation of the bipedal DNA walking machine in different types of cell lines including HeLa, MCF-7 and L02 cells. (A) Fluorescence images of HeLa, MCF-7 and L02 cells after incubated with the 2.5 nM DNA-functionalized AuNPs and 250  $\mu\text{M}$  Mn<sup>2+</sup> upon the light irradiation. (B) Average fluorescence intensity of the three different cell lines imaging. (C) Flow cytometry analysis of (1) HeLa, (2) MCF-7, and (3) L02 cells incubated with the bipedal DNA walking machine; and the (4) HeLa, (5) MCF-7, and (6) L02 cells incubated with the bipedal DNA walking machine and Mn<sup>2+</sup> upon the light irradiation. (D) Real-time fluorescence curves in qRT-PCR analysis, and (E) relative expression levels for miRNA-21 in MCF-7, HeLa and L02 cells.

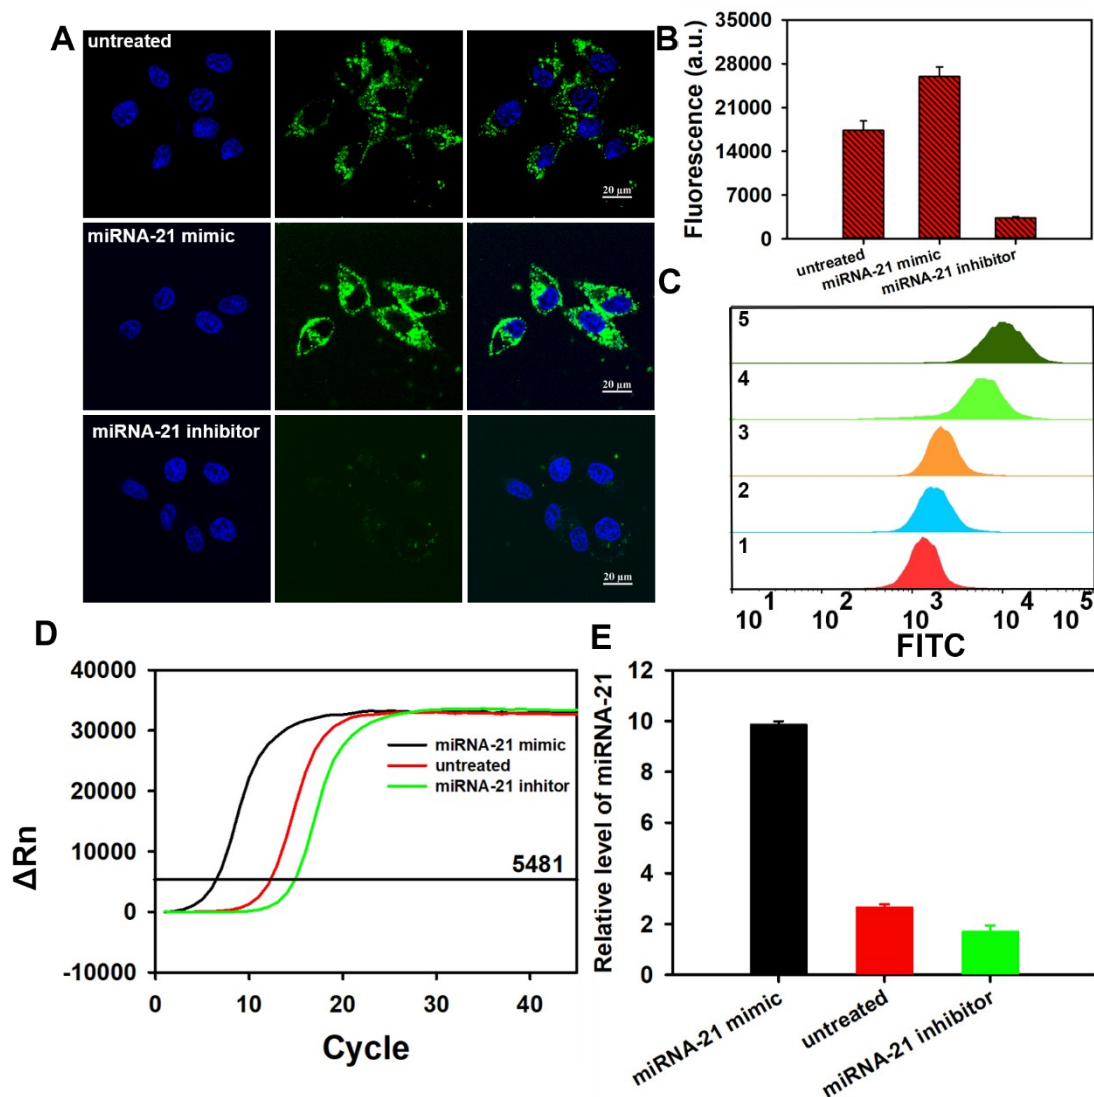

**Fig. S14** Operation of the bipedal DNA walking machine to investigate the fluctuation of miRNA-21 expression levels in HeLa cells. (A) Fluorescence images and (B) Mean fluorescence values of HeLa cells incubated with 0.2 mM MicrONTMhsa-miR-21-5p mimic or 0.5 mM MicrOFFTMhsa-miR-21-5p inhibitor for 24 h followed by DNA-functionalized with AuNPs (2.5 nM) and  $\text{Mn}^{2+}$  (250  $\mu\text{M}$ ) upon the light irradiation. (C) Flow cytometry analysis of HeLa cells (1), HeLa cells treated with 2.5 nM DNA-functionalized AuNPs (2), HeLa cells treated with 2.5 nM DNA-functionalized AuNPs and 250  $\mu\text{M}$   $\text{Mn}^{2+}$  upon the light irradiation (4), HeLa cells pretreated beforehand with miRNA inhibitor (3) or miRNA mimic (5) and then incubated with bipedal DNA walking machine and  $\text{Mn}^{2+}$  upon the light irradiation. (D) Real-time fluorescence curves in qRT-PCR analysis, and (E) relative expression levels for miRNA-21 in HeLa cells with different treatment.



## References.

- (1) K. C. Grabar, R. G. Freeman, M. B. Hommer, M. J. Natan, *Anal. Chem.*, 1995, **67**, 735-743.
- (2) H. Y. Peng, X. F. Li, H. Q. Zhang, X. C. Le, *Nat. Commun.* 2017, **8**, 14378-14390.
